# Supplementary material for: Cross-linked antifouling polysaccharide hydrogel coating as extracellular matrix mimics for wound healing
Source: Royal Society of Chemistry journal article supplement (doi:10.1039/c6tb03222b), 2017-01-01
Supplement: c6tb03222b1.pdf [file c6tb03222b1.pdf]

**Cross-Linked Antifouling Polysaccharide Hydrogel Coating as Extracellular  
Matrix Mimics for Wound Healing**

Yuqin Tang,<sup>a</sup> Xueqin Cai,<sup>a</sup> Yingying Xiang,<sup>a</sup> Yu Zhao,<sup>b</sup> Xinge Zhang,<sup>b</sup> Zhongming  
Wu,<sup>a\*</sup>

<sup>a</sup> 2011 Collaborative Innovation Center of Tianjin for Medical Epigenetics (Ministry of Health), Key Laboratory of Hormones and Development, Metabolic Diseases Hospital & Tianjin Institute of Endocrinology, Tianjin Medical University, Tianjin 300070, China.

<sup>b</sup> Key Laboratory of Functional Polymer Materials of Ministry Education, Institute of Polymer Chemistry, Nankai University, Tianjin 300071, China

\*Corresponding author

Key Laboratory of Hormones and Development Ministry of Health, Metabolic Diseases Hospital, Tianjin Medical University, Tianjin 300070, China

Tel.: +86 22 23343729; Fax: +86 22 23343729.

E-mail: [wuzhongming@tmu.edu.cn](mailto:wuzhongming@tmu.edu.cn)

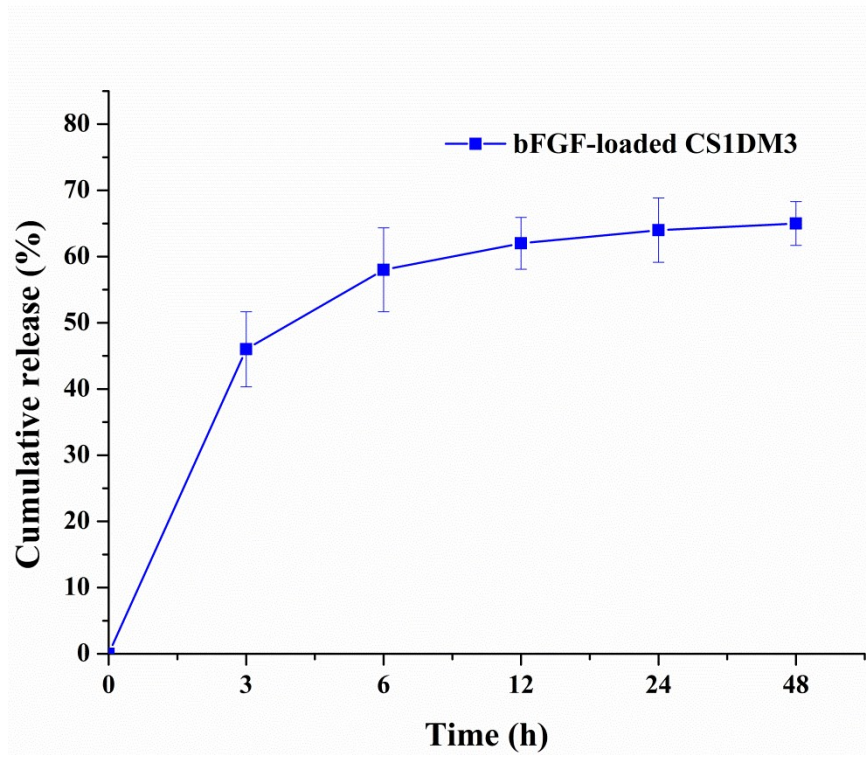

Figure S1. *In vitro* cumulative release percentage of bFGF from CS1DM3 hydrogel in pH 7.4 PBS.
